# Supplementary material for: A pH-responsive phase transformation of a sulfonated metal–organic framework from amorphous to crystalline for efficient CO2capture
Source: Royal Society of Chemistry journal article supplement (doi:10.1039/c6ce00369a), 2016-01-01
Supplement: c6ce00369a1.pdf [file c6ce00369a1.pdf]

Supplementary Information

**A pH-responsive phase transformation of a sulfonated metal-organic framework from amorphous to crystalline for efficient CO<sub>2</sub> capture**

Zhigang Hu,<sup>a</sup> Jiajin Lin,<sup>a</sup> Naoki Ogiwara,<sup>b</sup> Alvaro Rodriguez,<sup>a</sup> Yongwu Peng,<sup>a</sup> Yuxiang Wang,<sup>a</sup>

Satoshi Horike<sup>\*,b</sup> and Dan Zhao<sup>\*,a</sup>

<sup>a</sup> Department of Chemical & Biomolecular Engineering, National University of Singapore, 4 Engineering Drive 4, 117585 Singapore

<sup>b</sup> Department of Synthetic Chemistry and Biological Chemistry, Graduate School of Engineering, Kyoto University, Katsura, Nishikyo-ku, Kyoto 615-8510, Japan

Correspondence and requests for materials should be addressed to D.Z. (E-mail: [chezhao@nus.edu.sg](mailto:chezhao@nus.edu.sg)) or S.H. (E-mail: [horike@sbchem.kyoto-u.ac.jp](mailto:horike@sbchem.kyoto-u.ac.jp)).

## Materials and methods

All the reagents were obtained from commercial suppliers and used without further purification. NMR data were collected on a Bruker Avance 500 MHz NMR spectrometer (DRX500). FTIR spectra were obtained with a Bio-Rad FTS-3500 ARX FTIR spectrometer. Field-emission scanning electron microscope (FE-SEM) analyses were conducted on an FEI Quanta 600 SEM (20 kV) equipped with an energy dispersive spectrometer (EDS, Oxford Instruments, 80 mm<sup>2</sup> detector). Samples were treated via Pt sputtering before observation. Elemental analyses (EA) were performed on Vario MICRO series CHNOS elemental analyzer. Powder X-ray diffraction patterns were obtained on Bruker D8 Advance X-ray powder diffractometer equipped with a Cu sealed tube ( $\lambda = 1.54178 \text{ \AA}$ ) at a scan rate of  $0.02 \text{ deg s}^{-1}$ . TGA was performed using Shimadzu DTG-60AH thermal analyzer under flowing N<sub>2</sub> gas, with a heating rate of  $10 \text{ }^{\circ}\text{C min}^{-1}$ .

### Synthesis of UiO-66-SO<sub>3</sub>H<sup>1</sup>

A 20 mL mixed solvent of N, N-dimethylformamide (DMF) and acetic acid (9:1, v:v) was used to dissolve 180 mg of sodium 2-sulfoterephthalate (SS-BDC), followed by the addition of 160 mg of zirconium (IV) chloride (ZrCl<sub>4</sub>). The solution was sonicated for 15 min and subsequently heated at  $120 \text{ }^{\circ}\text{C}$  for 40 h. The solid product was recovered through centrifugation and washed with DMF for 3 times, and then soaked in DMF at  $80 \text{ }^{\circ}\text{C}$  for 12 h. The recovered sample was solvent-exchanged with methanol for 3 days, and was fully activated at  $120 \text{ }^{\circ}\text{C}$  under vacuum for 24 h.

Acidification was subsequently carried out by soaking the sample in 0.1 M of aqueous hydrochloric acid (HCl) solution for 12 h, followed by in ethanol solution of trifluoroacetic acid (10 vol%) for 6 h. The acidified sample was washed and solvent-exchanged with methanol for another 3 days, and then dried under vacuum at  $120 \text{ }^{\circ}\text{C}$  for 24 h to afford the final product of UiO-66-SO<sub>3</sub>H.

### Neutralization with alkali solution

Neutralization of UiO-66-SO<sub>3</sub>H was performed using aqueous alkali hydroxide solutions. The hydroxides include lithium hydroxide (LiOH), sodium hydroxide (NaOH), and potassium hydroxide (KOH). Taking LiOH as an example, a desired concentration was first obtained by dissolving LiOH powder with an appropriate amount of deionized water. 120 mg of UiO-66-SO<sub>3</sub>H was subsequently immersed in 20 mL of the prepared solution under room temperature for 2 h. The product was recovered through centrifugation, washed with deionized water, and subsequently underwent solvent exchange with ethanol for 3 days. The final product was recovered after the sample was activated under vacuum at  $120 \text{ }^{\circ}\text{C}$  for 24 h. All UiO-66-SO<sub>3</sub>M samples were prepared similarly.

### X-ray absorption spectra

Zr K-edge X-ray absorption spectra (XAS) of MOF samples were collected at Kyushu Synchrotron Radiation Center on BL07 (SAGA Light Source, Japan). XASs of powder samples were recorded in transmission mode under ambient conditions, using a double crystal monochromator. Incident and transmitted X-ray fluxes were measured with ion

chambers filled with N<sub>2</sub>/Ar (50/50%) and Ar/Kr (75/25%). The data were processed with IFEFFIT.<sup>2</sup> Fourier transformation was  $k^3$ -weighted in the  $k$  range from 3.0 to 15.0 Å<sup>-1</sup>.

## Gas sorption measurements

Gas sorption isotherms were measured up to 1 bar using a Micromeritics ASAP 2020 surface area and pore size analyzer. Before the measurements, the samples (~100 mg) were degassed under reduced pressure (< 10<sup>-2</sup> Pa) at 150 °C for 12 h. UHP grade N<sub>2</sub>, He, and CO<sub>2</sub> were used for all the measurements. Oil-free vacuum pumps and oil-free pressure regulators were used to prevent contamination of the samples during the degassing process and isotherm measurement. The temperatures of 77, 273 and 298 K were maintained with a liquid nitrogen bath, an ice water bath, and under room temperature, respectively. Pore size distribution data were calculated from the N<sub>2</sub> sorption isotherms at 77 K based on non-local density functional theory (NLDFT) model in the Micromeritics ASAP2020 software package (assuming slit pore geometry).

## Calculations of isosteric heat of adsorption ( $Q_{st}$ )

The CO<sub>2</sub> and N<sub>2</sub> adsorption isotherms measured at 273 K and 298 K were first fitted to a virial equation (Equation 1). The fitting parameters were then used to calculate the isosteric heat of adsorption ( $Q_{st}$ ) using Equation 2,

$$\ln P = \ln N + \frac{1}{T} \sum_{i=0}^m a_i N^i + \sum_{i=0}^n b_i N^i \quad (1)$$

$$Q_{st} = -R \sum_{i=0}^m a_i N^i \quad (2)$$

where  $P$  is pressure (mmHg),  $N$  is adsorbed quantity (mmol g<sup>-1</sup>),  $T$  is temperature (K),  $R$  is gas constant (8.314 J K<sup>-1</sup> mol<sup>-1</sup>),  $a_i$  and  $b_i$  are virial coefficients,  $m$  and  $n$  represent the number of coefficients required to adequately describe the isotherms (herein,  $m = 5$ ,  $n = 2$ ).

## Ideal adsorption solution theory (IAST) selectivity

The CO<sub>2</sub> and N<sub>2</sub> adsorption isotherms were first fitted to a dual-site Langmuir-Freundlich (DSLFL) model (Equation 3),

$$q = \frac{q_{sat,A} b_A p^{\alpha_A}}{1 + b_A p^{\alpha_A}} + \frac{q_{sat,B} b_B p^{\alpha_B}}{1 + b_B p^{\alpha_B}} \quad (3)$$

where  $q$  is the amount of adsorbed gas (mmol g<sup>-1</sup>),  $p$  is the bulk gas phase pressure (bar),  $q_{sat}$  is the saturation amount (mmol g<sup>-1</sup>),  $b$  is the Langmuir-Freundlich parameter (bar<sup>- $\alpha$</sup> ),  $\alpha$  is the Langmuir-Freundlich exponent (dimensionless) for two adsorption sites A and B indicating the presence of weak and strong adsorption sites.

IAST starts from the Raoult's Law type of relationship between fluid and adsorbed phase,

$$P_i = P y_i = P_i^o x_i \quad (4)$$

$$\sum_{i=1}^n x_i = \sum_{i=1}^n \frac{P_i}{P_i^o} = 1 \quad (5)$$

where  $P_i$  is partial pressure of component  $i$  (bar),  $P$  is total pressure (bar),  $y_i$  and  $x_i$  represent mole fractions of component  $i$  in gas and adsorbed phase (dimensionless).  $P_i^0$  is equilibrium vapour pressure (bar).

In IAST,  $P_i^0$  is defined by relating to spreading pressure  $\pi$ ,

$$\frac{\pi S}{RT} = \int_0^{P_i^0} \frac{q_i(P_i)}{P_i} dP_i = \Pi \text{ (Constant)} \quad (6)$$

where  $\pi$  is spreading pressure,  $S$  is specific surface area of adsorbent ( $\text{m}^2 \text{g}^{-1}$ ),  $R$  is gas constant ( $8.314 \text{ J K}^{-1} \text{ mol}^{-1}$ ),  $T$  is temperature (K),  $q_i(P_i)$  is the single component equilibrium obtained from isotherm ( $\text{mmol g}^{-1}$ ).

For a dual-site Langmuir-Freundlich (DSLFL) model, we have an analytical expression for the integral,

$$\int_0^{P_i^0} \frac{q_i(P_i)}{P_i} dP_i = \Pi \text{ (Constant)} = \frac{q_{sat,A}}{\alpha_A} \ln[1 + b_A (P_i^0)^{\alpha_A}] + \frac{q_{sat,B}}{\alpha_B} \ln[1 + b_B (P_i^0)^{\alpha_B}] \quad (7)$$

The isotherm parameters will be known from the previous fitting. For a binary component system the unknowns will be  $\Pi$ ,  $P_i^0$ , and  $P_2^0$  which can be obtained by simultaneously solving Equations 5 and 7.

The adsorbed amount for each compound in a mixture is

$$q_i^{mix} = x_i q_T \quad (8)$$

$$\frac{1}{q_T} = \sum_{i=1}^n \frac{x_i}{q_i(P_i^0)} \quad (9)$$

where  $q_i^{mix}$  is the adsorbed amount of component  $i$  ( $\text{mmol g}^{-1}$ ),  $q_T$  is the total adsorbed amount ( $\text{mmol g}^{-1}$ ).

The adsorption selectivities  $S_{ads}$  were calculated using Equation 10.

$$S_{ads} = \frac{q_1 / q_2}{p_1 / p_2} \quad (10)$$

In this study, IAST calculations were carried out assuming a  $\text{CO}_2/\text{N}_2$  (molar ratio, 15:85) binary mixed gas at 298 K and pressures up to 1 bar to mimic the composition and condition of flue gas.

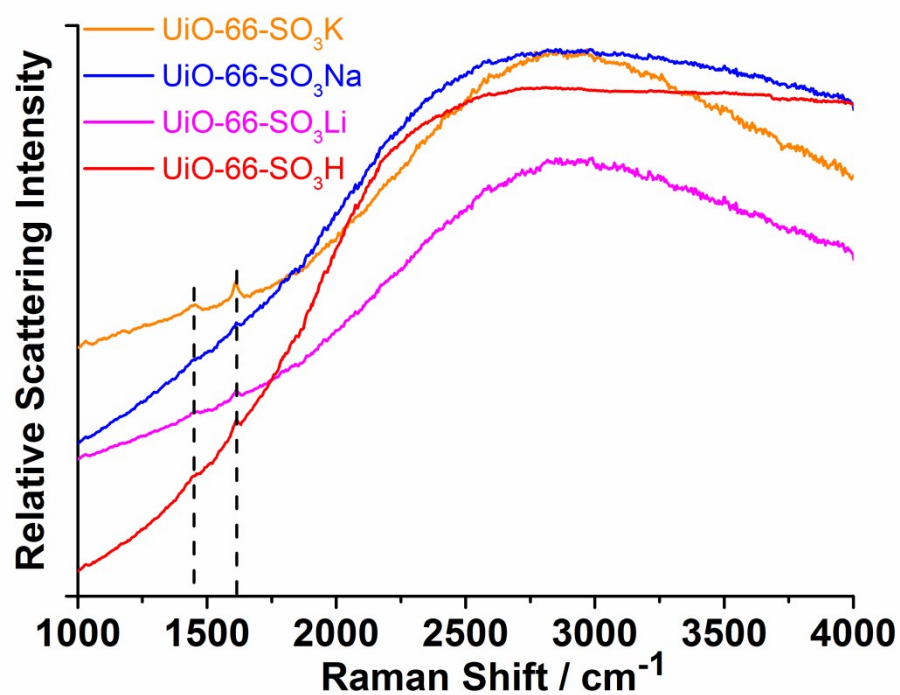

**Figure S1.** Raman spectra of amorphous UiO-66-SO<sub>3</sub>H and recrystallized UiO-66-SO<sub>3</sub>M.

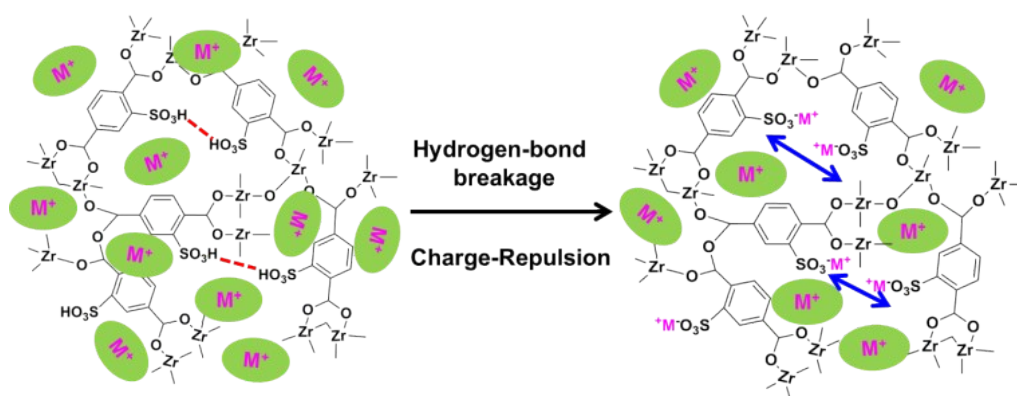

**Figure S2.** Proposed mechanism of pH-responsive phase transformation from amorphous UiO-66-SO<sub>3</sub>H to crystalline UiO-66-SO<sub>3</sub>M dominated by the breakage of hydrogen bonds and charge repulsion of metalation.

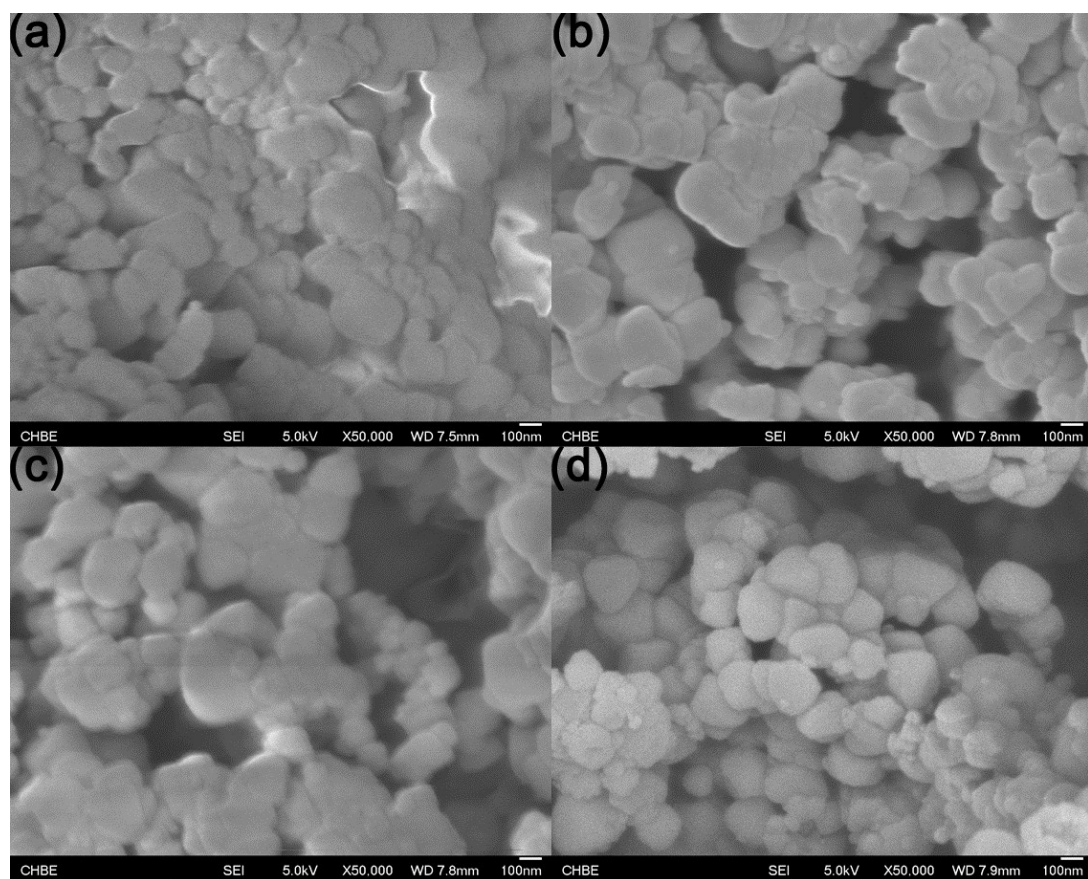

**Figure S3.** FE-SEM images of (a) amorphous UiO-66-SO<sub>3</sub>H, (b) UiO-66-SO<sub>3</sub>Li, (c) UiO-66-SO<sub>3</sub>Na, and (d) UiO-66-SO<sub>3</sub>K.

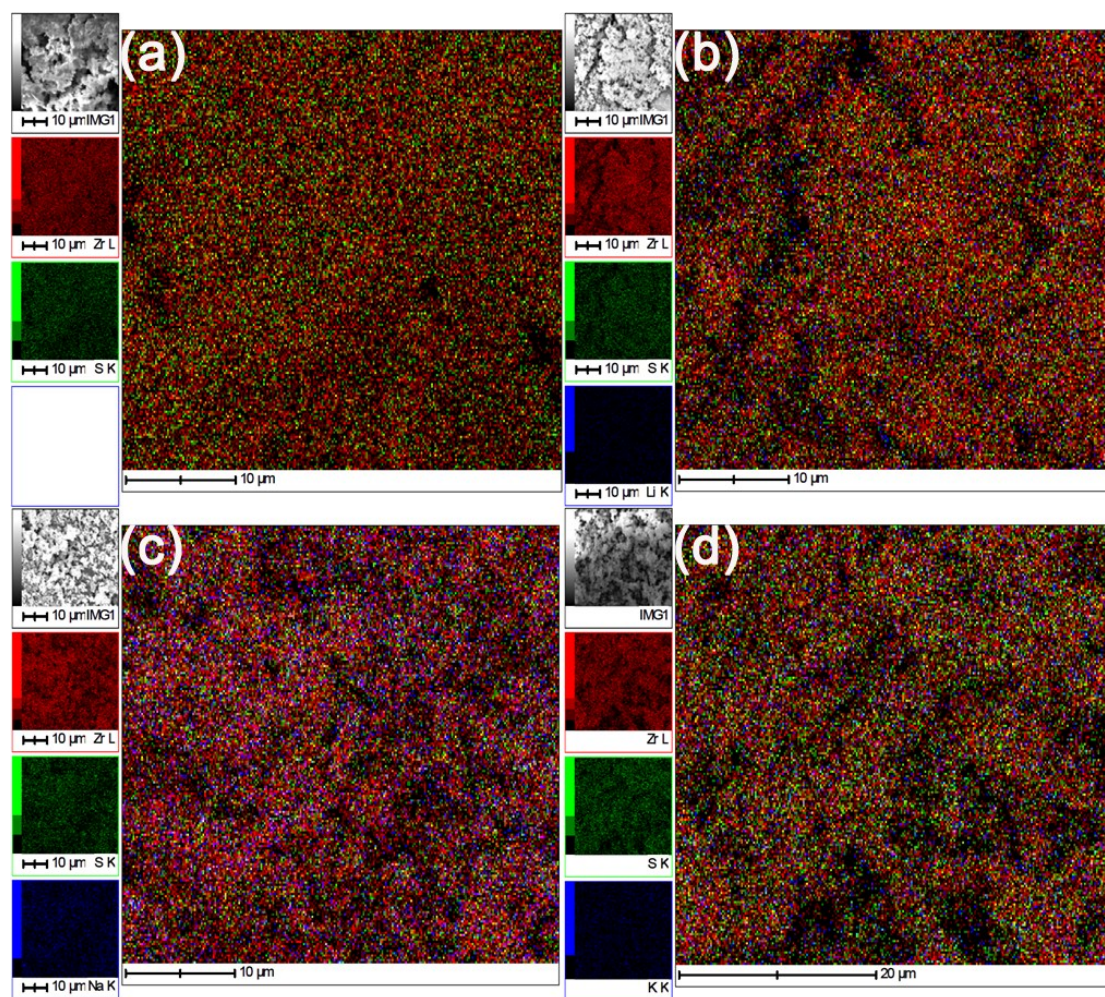

**Figure S4.** EDS elemental mapping images of (a) amorphous UiO-66-SO<sub>3</sub>H, (b) UiO-66-SO<sub>3</sub>Li, (c) UiO-66-SO<sub>3</sub>Na, and (d) UiO-66-SO<sub>3</sub>K.

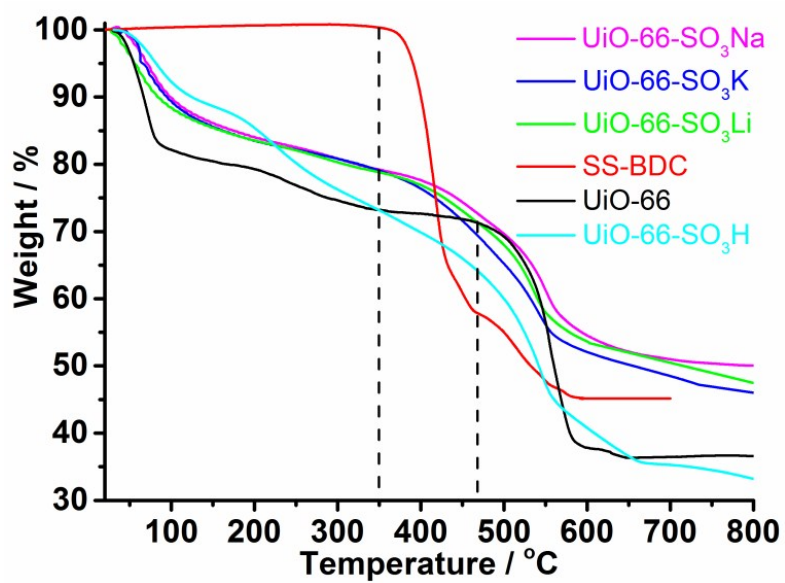

**Figure S5.** TGA curves of UiO-66-SO<sub>3</sub>H and UiO-66-SO<sub>3</sub>M.

**Table S1.** Summary of the amount and critical concentration of alkali hydroxide solutions required for phase transformation as well as the radius of alkali metal cations.

|                                                                                                                                     | UiO-66-SO <sub>3</sub> Li | UiO-66-SO <sub>3</sub> Na | UiO-66-SO <sub>3</sub> K |
|-------------------------------------------------------------------------------------------------------------------------------------|---------------------------|---------------------------|--------------------------|
| pH value                                                                                                                            | 12.3                      | 12.2                      | 12                       |
| MOH concentration <sup>a)</sup>                                                                                                     | 0.02                      | 0.016                     | 0.01                     |
| -SO <sub>3</sub> H content <sup>b)</sup>                                                                                            | 0.33 <sup>c)</sup>        | 0.33 <sup>c)</sup>        | 0.28 <sup>d)</sup>       |
| MOH in total <sup>b)</sup>                                                                                                          | 0.40                      | 0.32                      | 0.25                     |
| Diameter of M <sup>+</sup> <sup>e)</sup><br>45                                                                                      | 1.80                      | 2.32                      | 3.04                     |
| <sup>a)</sup> mol/L; <sup>b)</sup> mmol; <sup>c)</sup> 120 mg and <sup>d)</sup> 100 mg of UiO-66-SO <sub>3</sub> H; <sup>e)</sup> Å |                           |                           |                          |

**Table S2.** Summary of porosity, gas uptake,  $Q_{st}$ , and IAST  $CO_2/N_2$  selectivity of UiO-66, UiO-66- $SO_3H$ , and UiO-66- $SO_3M$  MOFs.

|                                                                                                                                                                                                                                                                                                                 |       | UiO-66 | UiO-66- $SO_3H$ | UiO-66- $SO_3Li$ | UiO-66- $SO_3Na$ | UiO-66- $SO_3K$ |
|-----------------------------------------------------------------------------------------------------------------------------------------------------------------------------------------------------------------------------------------------------------------------------------------------------------------|-------|--------|-----------------|------------------|------------------|-----------------|
| BET surface area <sup>a)</sup>                                                                                                                                                                                                                                                                                  |       | 1525   | 11              | 148              | 95               | 26              |
| Pore volume <sup>b)</sup>                                                                                                                                                                                                                                                                                       |       | 0.66   | 0.029           | 0.119            | 0.106            | 0.038           |
| CO <sub>2</sub> uptake at 0.15 bar <sup>c)</sup>                                                                                                                                                                                                                                                                | 298 K | 0.37   | 0.09            | 0.28             | 0.22             | 0.37            |
| CO <sub>2</sub> uptake at 1 bar <sup>c)</sup>                                                                                                                                                                                                                                                                   | 298 K | 1.79   | 0.32            | 0.89             | 0.74             | 0.91            |
|                                                                                                                                                                                                                                                                                                                 | 273 K | 3.12   | 0.67            | 1.36             | 1.08             | 1.95            |
| N <sub>2</sub> uptake at 1 bar <sup>c)</sup>                                                                                                                                                                                                                                                                    | 298 K | 0.144  | 0.046           | 0.129            | 0.158            | 0.076           |
|                                                                                                                                                                                                                                                                                                                 | 273 K | 0.235  | 0.121           | 0.225            | 0.251            | 0.213           |
| Zero-coverage $Q_{st}$ of CO <sub>2</sub> <sup>d)</sup>                                                                                                                                                                                                                                                         |       | 24.5   | n.d.            | 26.7             | 29.8             | 31.9            |
| Zero-coverage $Q_{st}$ of N <sub>2</sub> <sup>d)</sup>                                                                                                                                                                                                                                                          |       | 11.5   | 16.8            | 11.6             | 12.9             | 17.7            |
| IAST CO <sub>2</sub> /N <sub>2</sub> selectivity <sup>e)</sup>                                                                                                                                                                                                                                                  |       | 19.4   | 18.7            | 22.4             | 34.7             | 43.3            |
| Metal/sulfur molar ratio <sup>f)</sup>                                                                                                                                                                                                                                                                          |       | n.d.   | n.d.            | 0.97             | 0.92             | 0.84            |
| <sup>a)</sup> m <sup>2</sup> g <sup>-1</sup> ; <sup>b)</sup> cm <sup>3</sup> g <sup>-1</sup> ; <sup>c)</sup> mmol g <sup>-1</sup> ; <sup>d)</sup> kJ mol <sup>-1</sup> ; <sup>e)</sup> assuming a mixture of CO <sub>2</sub> /N <sub>2</sub> (15:85) at 298 K; <sup>f)</sup> EA analysis, n.d.: not determined. |       |        |                 |                  |                  |                 |

## References

1. M. L. Foo, S. Horike, T. Fukushima, Y. Hijikata, Y. Kubota, M. Takata and S. Kitagawa, *Dalton Trans.*, 2012, **41**, 13791-13794.
2. B. Ravel and M. Newville, *J. Synchrotron Radiat.*, 2005, **12**, 537-541.
